# Supplementary material for: Evidence for cadherin-11 cleavage in the synovium and partial characterization of its mechanism
Source: PubMed Central journal article supplement (PMC4449585; doi:10.1186/s13075-015-0647-9), 2015-05-15

**Fig. 5A**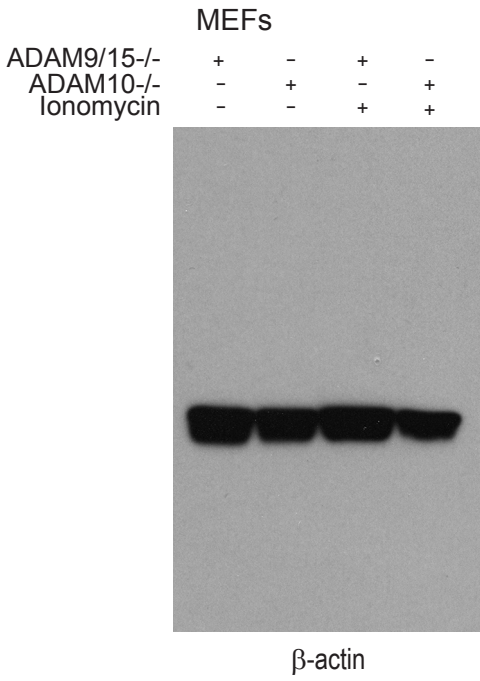**Fig. 5B**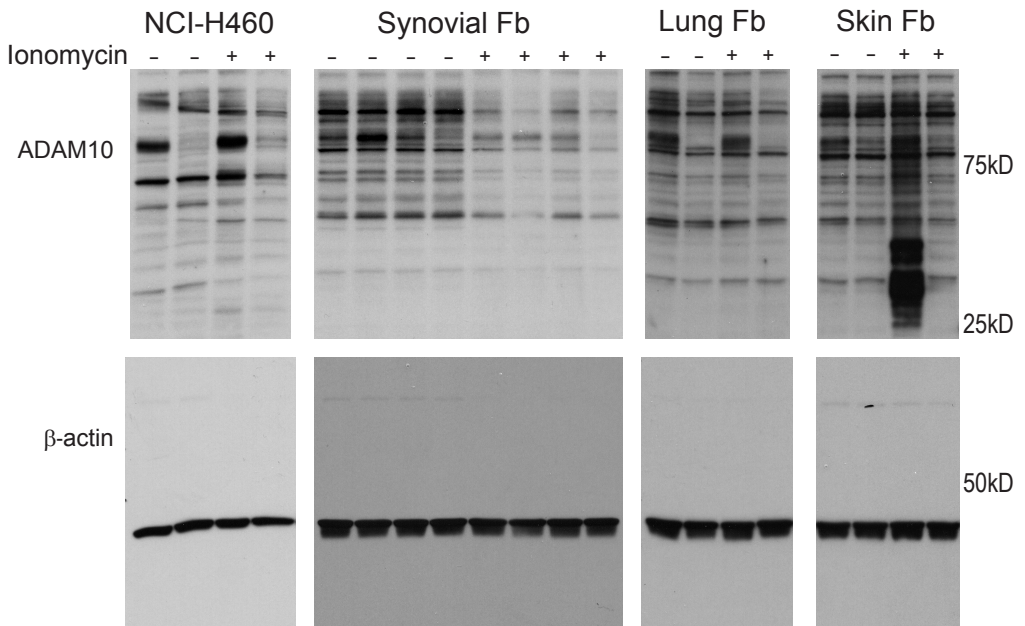**Fig. 5C**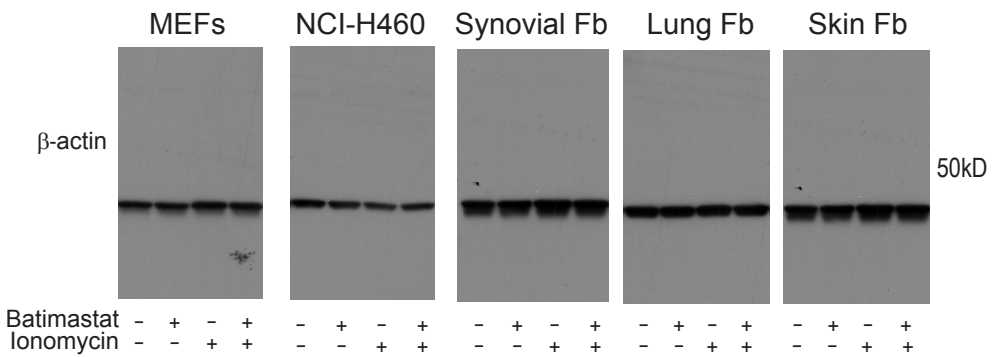

Supplement: 13075_2015_647_MOESM2_ESM.pdf [file 13075_2015_647_MOESM2_ESM.pdf]
