# Supplementary material for: Evidence for cadherin-11 cleavage in the synovium and partial characterization of its mechanism
Source: PubMed Central journal article supplement (PMC4449585; doi:10.1186/s13075-015-0647-9), 2015-05-15
Supplement: 13075_2015_647_MOESM3_ESM.pdf [file 13075_2015_647_MOESM3_ESM.pdf]

# Ionomycin

FL cadherin-11 >

-

+

-

+

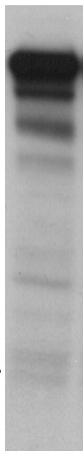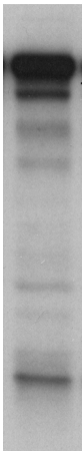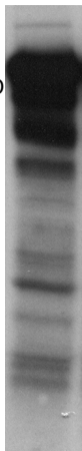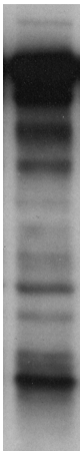

100 kD

100 kD

37kD

37kD

CTF1 >

Standard  
Exposure

Long  
Exposure
