# Supplementary material for: Evidence for cadherin-11 cleavage in the synovium and partial characterization of its mechanism
Source: PubMed Central journal article supplement (PMC4449585; doi:10.1186/s13075-015-0647-9), 2015-05-15

**A**Batimastat ( $\mu\text{M}$ )  
IonomycinDMSO DMSO 0.1 0.3 1 3 10  
- + + + + + +*Cad11*100 kD  
37 kD $\beta$ -actin100 kD  
37 kD

NCI-H460

**B**- - DMSO 3 10 30  
- + + + +100 kD  
37 kD100 kD  
37 kDSynovial  
Fibroblasts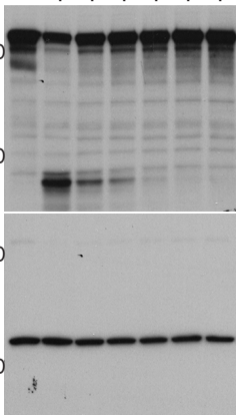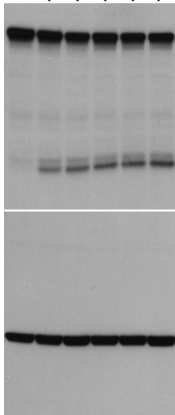

Supplement: 13075_2015_647_MOESM5_ESM.pdf [file 13075_2015_647_MOESM5_ESM.pdf]
