# Supplementary material for: Evidence for cadherin-11 cleavage in the synovium and partial characterization of its mechanism
Source: Arthritis Res Ther. 2015 May 15;17(1):126. doi: 10.1186/s13075-015-0647-9 (PMC4449585; doi:10.1186/s13075-015-0647-9)
Supplement: Additional file 7: Figure. S7. — Comparison of cadherin-11 sequence to known metalloproteinase cleavage sites in other cadherins. E-cadherin, N-cadherin, and cadherin-11 extracellular domain amino acid sequences just proximal to the transmembrane domain are aligned. Known amino acids acid involved in metalloproteinase-mediated ectodomain shedding are indicated by bold, underlined typeface. [file 13075_2015_647_MOESM7_ESM.pdf]

|             |                                         |                            |               |
|-------------|-----------------------------------------|----------------------------|---------------|
| E-cadherin  | 681                                     | 700-701                    | 711           |
|             | ...LEVSVCDCEGAAGVCRKAQ                  | <u>PVE</u> EAGLQIPAIL..... |               |
| N-cadherin  | 691                                     | 715                        | 726           |
|             | ...RVKVCQCDSNGGDCTDVDR                  | <u>I</u> VGAGLGTGAII.....  |               |
| Cadherin-11 | 591                                     |                            | 621           |
|             | ...KVCGCDVNGALLSCNAEAYILNAGLSTGALI..... |                            |               |
|             | EXTRACELLULAR                           |                            | TRANSMEMBRANE |
