# Supplementary material for: Evidence for cadherin-11 cleavage in the synovium and partial characterization of its mechanism
Source: Springer Nature journal article supplement (doi:10.1186/s13075-015-0647-9), 2015-05-14

**A**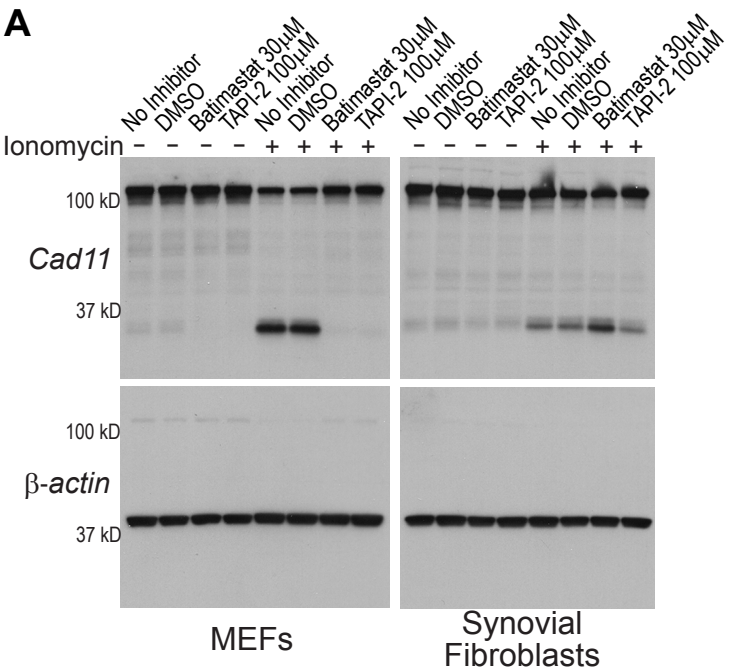**B**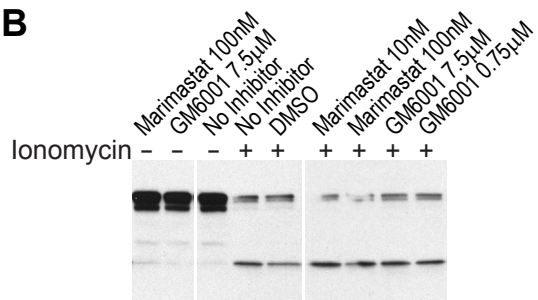

Supplement: MOESM6 [file 9783726]
